# Supplementary material for: One-pot synthesis of a polyaniline–gold nanocomposite and its enhanced electrochemical properties for biosensing applications
Source: Royal Society of Chemistry journal article supplement (doi:10.1039/c5ra06146f), 2015-01-01

## One-pot synthesis of polyaniline-gold nanocomposite and its enhanced electrochemical properties for biosensing application

Amrita Soni, Chandra Mouli Pandey, Shipra Solanki, Gajjala Sumana  
Biomedical Instrumentation Section, CSIR-National Physical Laboratory, New Delhi-110012,  
India.

### Supporting information

**Figure S1.** DLS measurements representing (a) particle size distribution of AuNPs. (b) zeta potential values of AuNPs (c) zeta potential values of PANI-Au nanocomposite synthesized by chemical route.

**Figure S2.** BET surface area analysis of (i) EC-PANI-Au nanocomposite (ii) PANI-Au nanocomposite synthesized by chemical route.

**Figure S3.** FT-IR spectra of (a) PANI/ITO electrode (b) EPD-PANI-Au/ITO electrode (c) pDNA/EPD-PANI-Au/ITO bioelectrode.

**Figure S4.** Cyclic voltammetric analysis of (a) (i) bare ITO (ii) pDNA/EPD-PANI-Au/ITO electrode (iii) pDNA/EC-PANI-Au/ITO electrode (iv) EPD-PANI-Au/ITO (v) EC-PANI-Au/ITO at 50 mVs<sup>-1</sup>. CV analysis of (b) EPD-PANI-Au/ITO electrode (c) EC-PANI-Au/ITO electrode with varying scan rates in PBS (100 mM, pH 7.0, 0.9% NaCl) containing 5 mM [Fe(CN)<sub>6</sub>]<sup>3-/4-</sup>. Inset figures show linearity plot of the peak current values as a function of square root of scan rate and the plot of peak potential values as a function of log of scan rate.

**Figure S5.** (a) Percentage change in hybridization efficiency for pDNA/EPD-PANI-Au/ITO bioelectrode with repeated denaturation and rehybridization process. (b) Stability of the electrode after 14 weeks.

Figure S1.

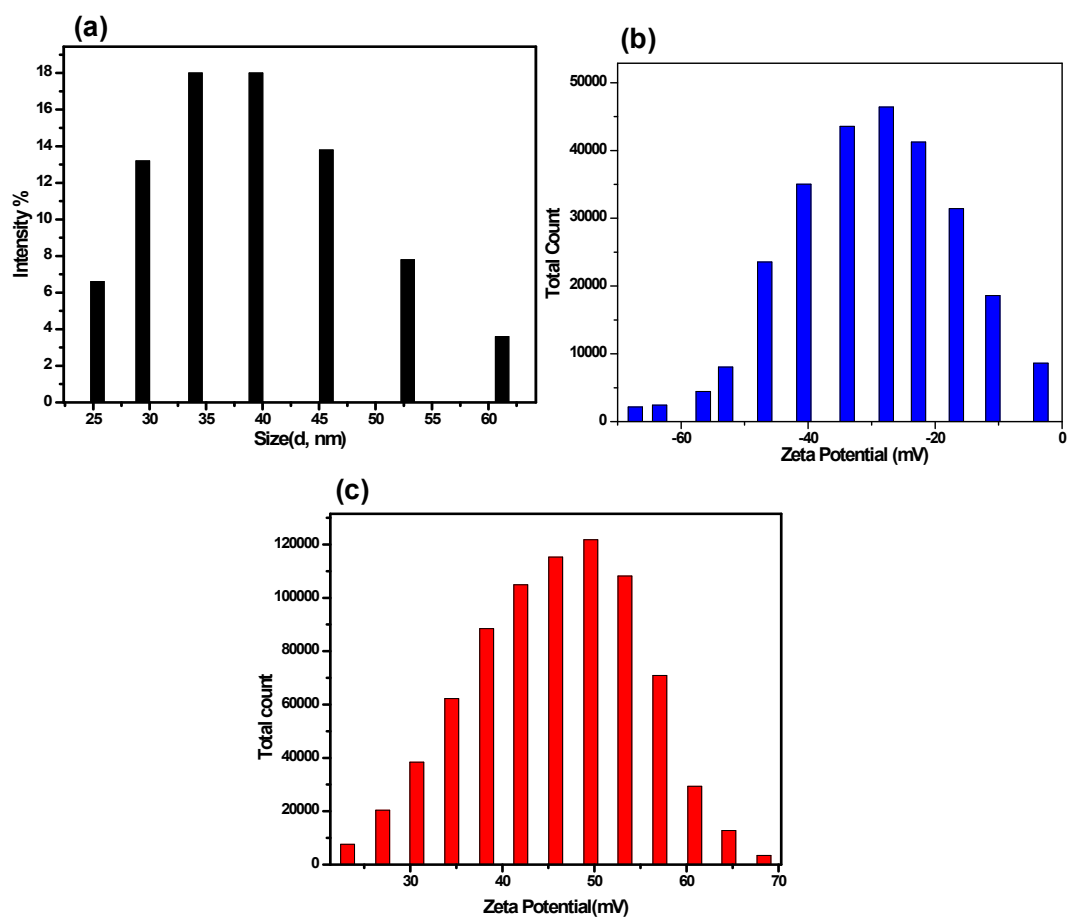

Figure S2.

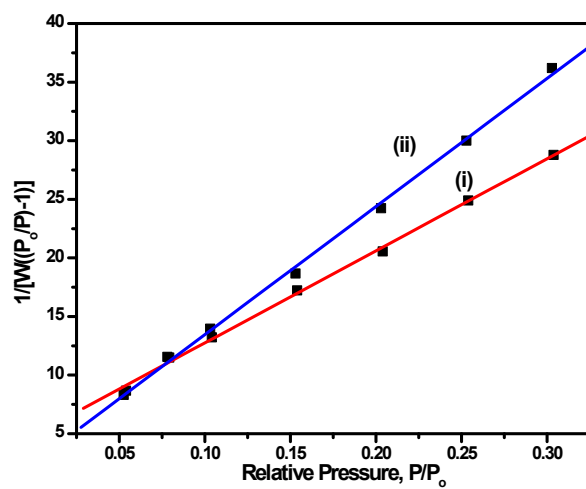

Figure S3.

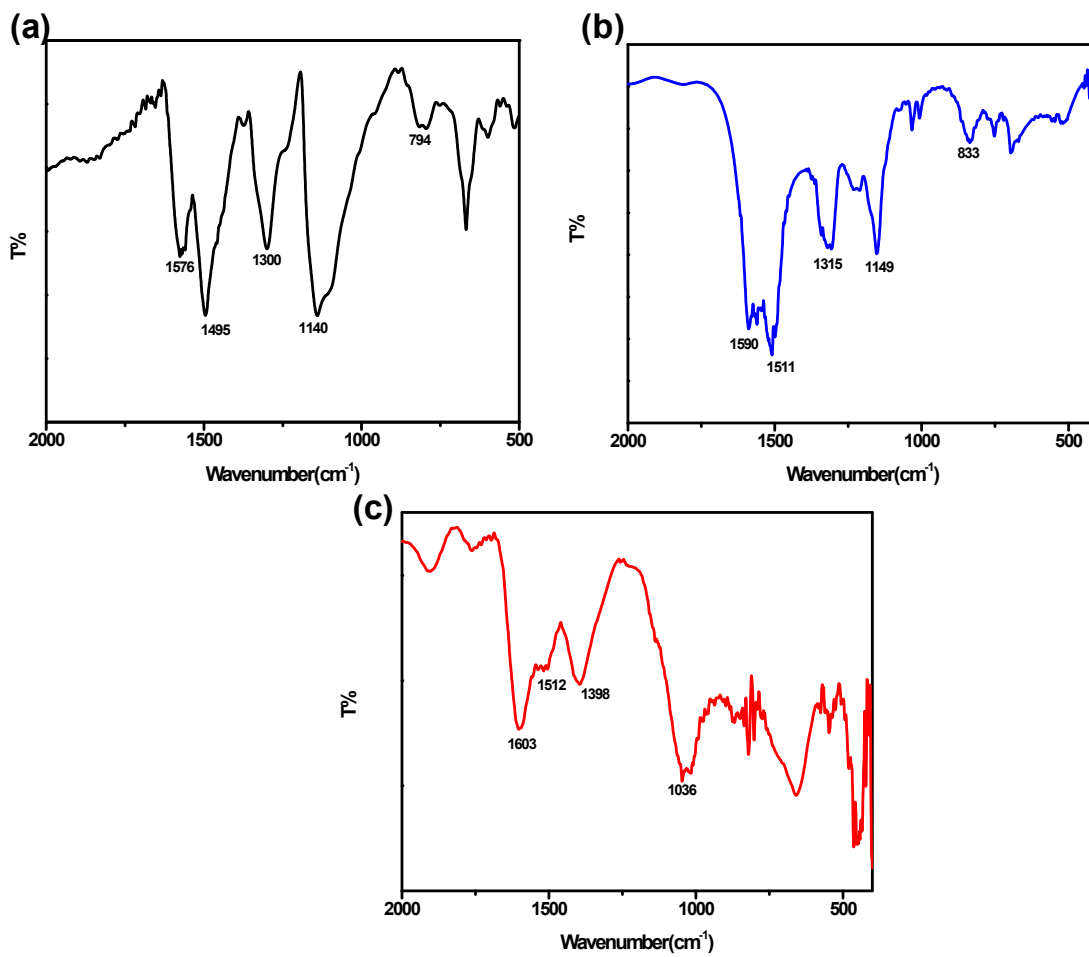

Figure S4.

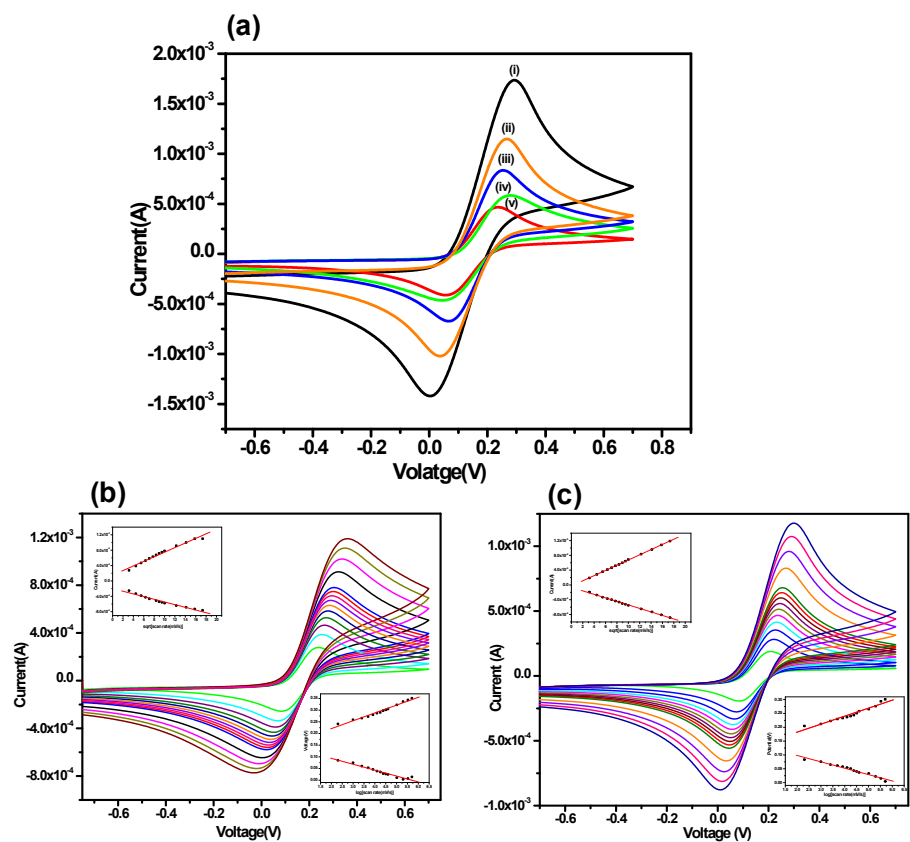

Figure S5.

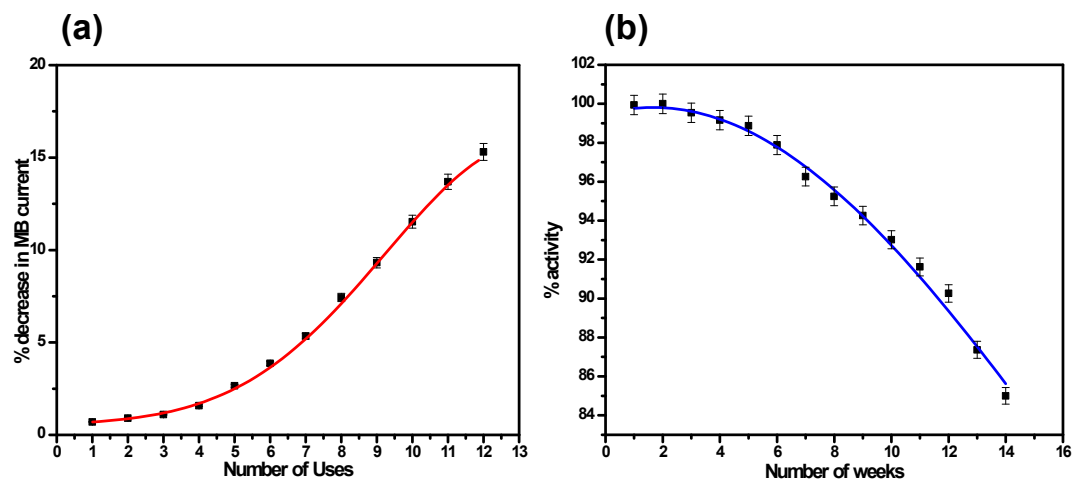

Supplement: c5ra06146f1.pdf [file c5ra06146f1.pdf]
